# Supplementary material for: Neuronal human BACE1 knockin induces systemic diabetes in mice
Source: Springer Nature journal article supplement (doi:10.1007/s00125-016-3960-1), 2016-05-02
Supplement: MOESM1 [file 10103142]

ESM Table 1

| Identification       | Ionisation Mode | Adducts                                    | m/z       | Mass Error (ppm) | Anova (p) | Fold Change |
|----------------------|-----------------|--------------------------------------------|-----------|------------------|-----------|-------------|
| <b>Phospholipids</b> |                 |                                            |           |                  |           |             |
| <b>PC and LysoPC</b> |                 |                                            |           |                  |           |             |
| PC(16:0)             | +               | M+H, M+Na                                  | 496.3400  | 0.68             | 0.009     | 1.21        |
| PC(18:1)             | +               | M+H, M+Na                                  | 522.3557  | 1.328            | 0.008     | 1.21        |
| PC(22:6)             | +               | M+H                                        | 568.3400  | 0.41             | 0.002     | 1.33        |
| PC(32:0)             | -               | M-H, M+FA-H                                | 732.5550  | 0.22             | 0.020     | 1.24        |
| PC(34:0)             | -               | M+FA-H                                     | 806.5934  | 2.27             | 0.004     | 1.12        |
| PC(34:1)             | +               | M+H, M+Na, M+K                             | 760.5848  | -0.39            | 0.005     | 1.13        |
| PC(34:2)             | +               | M+Na, M+K                                  | 780.5519  | 0.97             | 0.023     | 1.18        |
| PC(34:3)             | +               | M+H                                        | 756.5542  | 0.47             | 0.022     | 1.23        |
| PC(36:1)             | +               | M+Na, M+K, M+H                             | 788.6163  | -0.86            | 0.008     | 1.16        |
| PC(36:3)             | +               | M+H                                        | 784.5852  | 0.18             | 0.0004    | 1.35        |
| PC(36:4)             | +               | M+H, M+K                                   | 782.5694  | 0.02             | 0.0007    | 1.27        |
|                      | -               | M+FA-H, M-H, M+Na-2H, M-H <sub>2</sub> O-H | 778.5776  | -0.64            | 0.010     | 1.17        |
| PC(36:5)             | +               | M+H, M+Na                                  | 780.5543  | 0.56             | 0.0002    | 1.31        |
| PC(38:3)             | +               | M+H                                        | 812.6162  | -0.29            | 0.0008    | 1.33        |
| PC(38:4)             | +               | M+H                                        | 810.5996  | -1.39            | 0.0009    | 1.26        |
| PC(38:5)             | -               | M+FA-H, M-H <sub>2</sub> O-H               | 788.5291  | 2.06             | 0.002     | 1.14        |
| PC(38:6)             | +               | M+H, M+Na, M+K                             | 806.5690  | -0.64            | 0.0014    | 1.26        |
|                      | -               | M+FA-H, M-H <sub>2</sub> O-H,              | 786.5099  | 2.48             | 0.001     | 1.35        |
| PC(38:7)             | +               | M+H, M+Na                                  | 804.5540  | 0.20             | 0.005     | 1.29        |
| PC(38:8)             | +               | M+H                                        | 802.5374  | -0.98            | 0.001     | 1.71        |
| PC(40:4)             | +               | M+H, M+Na, M+K                             | 838.6304  | -2.06            | 0.001     | 1.24        |
| PC(40:6)             | +               | M+H, M+Na, M+K                             | 834.5998  | -1.15            | 0.002     | 1.21        |
| PC(40:7)             | +               | M+H, M+Na, M+K                             | 832.5842  | -0.89            | 0.0007    | 1.24        |
| PC(40:8)             | -               | M+FA-H                                     | 874.5626  | 2.71             | 0.0007    | 1.43        |
| PC(42:10)            | +               | M+Na, M+K, M+H                             | 854.5699  | 0.54             | 0.0001    | 1.40        |
|                      | -               | M+FA-H                                     | 898.5622  | 2.10             | 4.64E-05  | 1.36        |
| PC(42:4)             | +               | M+Na, M+K, M+H                             | 866.6628  | 0.41             | 0.038     | 1.26        |
| PC(42:5)             | +               | M+Na                                       | 886.6284  | -1.41            | 0.007     | 1.23        |
|                      | -               | M-H                                        | 862.6315  | -1.93            | 0.037     | 1.41        |
| PC(42:6)             | +               | M+H                                        | 862.6345  | 3.38             | 0.0009    | 1.28        |
| PC(42:7)             | +               | M+Na                                       | 882.5981  | -0.22            | 7.85E-05  | 1.33        |
| PC(42:8)             | +               | M+Na                                       | 880.5853  | 3.07             | 0.0006    | 1.50        |
| PC(42:9)             | -               | M+FA-H                                     | 900.5778  | 2.05             | 1.52E-05  | 1.97        |
| PC(44:12)            | +               | M+H, M+Na, M+K                             | 878.5697  | 0.35             | 0.0009    | 1.29        |
|                      | -               | M+FA-H                                     | 922.5562  | -4.74            | 0.001     | 1.22        |
| PC(52:4)             | +               | M+Na                                       | 1028.8012 | -0.54            | 0.016     | 1.25        |
| PC(O-32:0)           | +               | M+H, M+Na                                  | 720.5904  | 0.261            | 0.0007    | 1.29        |

|                      |   |                |          |       |        |       |
|----------------------|---|----------------|----------|-------|--------|-------|
|                      | - | M+FA-H         | 764.5833 | 3.01  | 0.039  | 1.14  |
| PC(O-34:0)           | + | M+H, M+Na      | 748.6215 | 1.29  | 0.013  | 1.24  |
| PC(O-34:1)           | + | M+H            | 746.6065 | 0.89  | 0.0027 | 1.28  |
| PC(O-42:2)           | + | M+H            | 856.7155 | 0.14  | 0.006  | 1.56  |
| PC(P-32:0)           | + | M+Na           | 740.5574 | 1.32  | 0.0002 | 1.16  |
| PC(P-34:4)           | + | M+H            | 738.5449 | 2.25  | 0.009  | 1.26  |
| PC(P-36:1)           | + | M+H            | 772.6224 | 1.09  | 0.031  | 1.20  |
| PC(P-38:5)           | + | M+H, M+Na      | 792.5897 | -0.70 | 0.0002 | 1.35  |
| PC(P-40:6)           | + | M+H            | 818.6072 | 1.62  | 0.002  | 1.292 |
| <b>PE and LysoPE</b> |   |                |          |       |        |       |
| PE(16:0)             | - | M-H            | 452.2789 | 1.44  | 0.004  | 1.20  |
| PE(18:0)             | + | M+H            | 482.3243 | 0.27  | 0.014  | 1.23  |
|                      | - | M-H            | 480.3101 | 1.06  | 0.004  | 1.23  |
| PE(18:1)             | - | M-H            | 478.2944 | 0.99  | 0.042  | 1.24  |
| PE(20:1)             | - | M-H            | 506.3256 | 0.84  | 0.007  | 1.19  |
| PE(20:4)             | + | M+H            | 502.2932 | 0.74  | 0.037  | 1.22  |
| PE(22:4)             | + | M+H            | 530.3252 | 1.95  | 0.003  | 1.35  |
|                      | - | M-H            | 528.3101 | 1.08  | 0.048  | 1.79  |
| PE(22:6)             | + | M+H            | 526.2929 | 0.05  | 0.006  | 1.39  |
| PE(34:0)             | + | M+H, M+Na      | 734.5696 | -1.06 | 0.001  | 1.19  |
|                      | - | M-H            | 718.5408 | 2.17  | 0.000  | 1.18  |
| PE(36:1)             | - | M-H            | 744.5567 | 2.43  | 0.003  | 1.12  |
| PE(36:3)             | + | M+H, M+Na      | 742.5386 | 0.62  | 0.017  | 1.32  |
| PE(36:4)             | + | M+Na, M+K, M+H | 740.5236 | -0.57 | 0.010  | 1.23  |
|                      | - | M-H            | 738.5100 | 2.80  | 0.015  | 1.11  |
| PE(36:5)             | + | M+H            | 738.5078 | 1.20  | 0.000  | 1.59  |
| PE(38:0)             | - | M-H            | 774.6009 | -1.22 | 0.040  | 1.28  |
| PE(38:3)             | - | M-H            | 768.5574 | 3.26  | 0.000  | 1.29  |
| PE(38:5)             | - | M-H            | 764.5250 | 1.82  | 0.001  | 1.62  |
| PE(38:6)             | + | M+H, M+Na      | 764.5233 | 0.96  | 0.001  | 1.30  |
| PE(40:0)             | + | M+Na           | 826.6279 | -2.11 | 0.009  | 1.97  |
| PE(40:10)            | + | M+Na           | 810.5020 | -3.12 | 0.022  | 1.65  |
| PE(40:4)             | - | M-H            | 794.5724 | 2.30  | 0.000  | 1.18  |
| PE(40:5)             | + | M+Na           | 816.5498 | -1.97 | 0.003  | 2.42  |
| PE(40:6)             | + | M+H, M+K, M+Na | 792.5545 | 0.84  | 0.003  | 1.24  |
|                      | - | M-H            | 790.5415 | 2.83  | 0.003  | 1.14  |
| PE(42:5)             | - | M-H            | 820.5877 | 1.91  | 0.007  | 1.25  |
| PE(42:6)             | + | M+H, M+Na      | 820.5842 | -1.16 | 0.007  | 1.35  |
| PE(42:7)             | + | M+H            | 818.5688 | -0.87 | 0.028  | 1.37  |
|                      | - | M-H            | 816.5573 | 2.98  | 0.002  | 1.17  |
| PE(42:8)             | - | M-H            | 814.5410 | 2.12  | 0.000  | 1.83  |
| PE(42:9)             | - | M-H            | 812.5256 | 2.47  | 0.000  | 1.48  |

|            |   |                |          |       |        |      |
|------------|---|----------------|----------|-------|--------|------|
| PE(44:12)  | + | M+H            | 836.5242 | 2.04  | 0.001  | 1.28 |
| PE(O-36:0) | - | M-H            | 732.5930 | 2.36  | 0.008  | 1.32 |
| PE(P-16:0) | - | M-H            | 436.2838 | 1.01  | 0.005  | 1.27 |
| PE(P-18:0) | + | M+H            | 466.3293 | 0.20  | 0.005  | 1.30 |
| PE(P-36:3) | - | M-H            | 724.5319 | 4.40  | 0.007  | 1.20 |
| PE(P-36:4) | + | M+H            | 724.5289 | 1.79  | 0.001  | 1.30 |
| PE(P-38:4) | + | M+H            | 752.5603 | 1.79  | 0.004  | 1.27 |
|            | - | M-H            | 750.5461 | 2.31  | 0.006  | 1.15 |
| PE(P-38:6) | + | M+H, M+Na      | 748.5293 | 2.20  | 0.001  | 1.30 |
| PE(P-40:4) | + | M+H, M+Na      | 780.5911 | 1.12  | 0.011  | 1.28 |
| PE(P-40:6) | + | M+H, M+Na, M+K | 776.5606 | 2.16  | 0.002  | 1.27 |
| <b>PG</b>  |   |                |          |       |        |      |
| PG(38:4)   | + | M+H            | 799.5507 | 2.86  | 0.033  | 1.41 |
|            | - | M-H            | 797.5358 | 2.45  | 0.007  | 1.26 |
| PG(38:5)   | - | M-H            | 795.5198 | 2.10  | 0.014  | 1.67 |
| PG(40:6)   | - | M-H            | 821.5334 | -0.46 | 0.043  | 1.39 |
| PG(42:10)  | - | M-H            | 841.5040 | 1.73  | 0.006  | 1.27 |
| PG(42:9)   | - | M-H            | 843.5196 | 1.69  | 0.001  | 1.94 |
| PG(44:12)  | - | M-H            | 865.5040 | 1.76  | 0.006  | 1.19 |
| <b>PS</b>  |   |                |          |       |        |      |
| PS(36:2)   | + | M+H            | 788.5424 | -1.64 | 0.006  | 1.24 |
|            | - | M-H            | 786.5310 | 2.51  | 0.022  | 1.12 |
| PS(36:3)   | + | M+H            | 786.5314 | 4.32  | 0.036  | 1.34 |
|            | - | M-H            | 784.5146 | 1.49  | 0.012  | 1.21 |
| PS(37:0)   | - | M-H            | 804.5777 | 2.10  | 0.012  | 1.10 |
| PS(37:2)   | - | M-H            | 800.5461 | 1.70  | 0.006  | 1.61 |
| PS(38:0)   | - | M-H            | 818.5940 | 2.88  | 0.034  | 1.14 |
| PS(38:3)   | + | M+H            | 814.5593 | 0.04  | 0.005  | 1.22 |
|            | - | M-H            | 812.5443 | -0.44 | 0.011  | 1.15 |
| PS(38:4)   | + | M+H, M+Na      | 812.5448 | 1.40  | 0.035  | 1.16 |
| PS(39:0)   | - | M-H            | 832.6094 | 2.47  | 0.006  | 1.13 |
| PS(39:1)   | - | M-H, M+Na-2H   | 830.5934 | 2.13  | 0.017  | 1.12 |
| PS(39:4)   | - | M-H            | 824.5467 | 2.45  | 0.011  | 1.18 |
| PS(40:6)   | + | M+H, M+Na      | 836.5432 | -0.56 | 0.001  | 1.29 |
| PS(40:7)   | + | M+H            | 834.5290 | 1.22  | 0.007  | 1.19 |
| PS(41:2)   | - | M-H            | 856.6092 | 2.25  | 0.0002 | 1.23 |
| PS(41:5)   | + | M+Na           | 874.5546 | -2.60 | 0.006  | 1.72 |
| PS(41:6)   | + | M+Na, M+K      | 872.5389 | -2.72 | 0.021  | 1.19 |
|            | - | M-H            | 848.5466 | 2.19  | 0.004  | 1.17 |
| PS(42:10)  | - | M-H            | 854.4996 | 2.11  | 0.001  | 1.43 |
| PS(42:5)   | - | M-H            | 864.5790 | 3.44  | 0.014  | 1.24 |

|                      |   |                |           |       |          |      |
|----------------------|---|----------------|-----------|-------|----------|------|
| PS(42:8)             | + | M+Na           | 882.5289  | 3.86  | 0.001    | 1.64 |
| PS(43:6)             | - | M-H            | 876.5774  | 1.60  | 0.001    | 1.16 |
| PS(44:10)            | + | M+H, M+Na      | 884.5468  | 3.61  | 0.001    | 1.35 |
| PS(44:12)            | - | M-H            | 878.4971  | -0.75 | 0.003    | 1.52 |
| PS(49:2)             | - | M-H            | 828.5774  | 1.62  | 0.0003   | 1.26 |
| PS(P-40:0)           | - | M-H            | 830.6313  | 3.93  | 0.030    | 1.19 |
| <b>PI</b>            |   |                |           |       |          |      |
| PI(36:3)             | - | M-H            | 859.5327  | -1.77 | 0.007    | 1.43 |
| PI(36:4)             | - | M-H            | 857.5201  | 1.77  | 0.000    | 1.21 |
| PI(37:4)             | - | M-H            | 871.5360  | 2.08  | 0.024    | 1.18 |
| PI(38:5)             | - | M-H            | 883.5358  | 1.82  | 2.61E-04 | 1.20 |
| PI(38:6)             | - | M-H            | 881.5202  | 1.90  | 0.026    | 1.12 |
| PI(40:4)             | - | M-H            | 913.5832  | 2.23  | 0.016    | 1.16 |
| PI(40:5)             | - | M-H            | 911.5673  | 1.96  | 0.006    | 1.18 |
| PI(40:8)             | - | M-H            | 905.5206  | 2.30  | 5.87E-06 | 1.90 |
| PI(42:10)            | - | M-H            | 929.5213  | 2.91  | 0.001    | 2.06 |
| PI(P-38:4)           | - | M-H            | 869.5566  | 1.88  | 4.67E-05 | 1.42 |
| <b>Other PL</b>      |   |                |           |       |          |      |
| CL(68:2)             | + | M+NH4          | 1423.0414 | 2.88  | 0.047    | 1.69 |
| <b>Sphingomyelin</b> |   |                |           |       |          |      |
| SM(d32:1)            | + | M+H            | 675.5442  | 0.88  | 0.033    | 1.21 |
| SM(d34:1)            | + | M+H, M+Na, M+K | 703.5757  | 1.09  | 0.003    | 1.24 |
|                      | - | M+FA-H         | 747.5674  | 2.35  | 0.001    | 1.16 |
| SM(d34:2)            | + | M+H            | 701.5560  | -4.60 | 0.001    | 1.30 |
| SM(d35:1)            | + | M+H, M+Na      | 717.5873  | -4.51 | 0.001    | 1.31 |
|                      | - | M-H            | 715.5780  | 2.81  | 0.001    | 1.16 |
| SM(d36:0)            | + | M+H            | 733.6222  | 0.47  | 0.005    | 1.24 |
| SM(d36:1)            | + | M+H, M+Na, M+K | 731.6072  | 1.39  | 0.002    | 1.18 |
|                      | - | M+FA-H         | 775.5960  | -1.55 | 0.005    | 1.14 |
| SM(d36:2)            | + | M+H, M+K, M+Na | 729.5913  | 1.02  | 0.000    | 1.45 |
|                      | - | M+FA-H         | 773.5818  | 0.44  | 3.68E-04 | 1.32 |
| SM(d38:1)            | + | M+H, M+Na      | 759.6387  | 1.55  | 0.009    | 1.20 |
| SM(d40:2)            | + | M+H            | 785.6528  | -0.42 | 0.019    | 1.24 |
|                      | - | M+FA-H         | 829.6469  | 3.58  | 0.020    | 1.21 |
| SM(d42:3)            | - | M+FA-H         | 855.6625  | 3.46  | 0.023    | 1.18 |
| <b>Sphingolipids</b> |   |                |           |       |          |      |
| Cer(d36:0)           | - | M-H            | 566.5528  | 1.81  | 0.039    | 1.19 |
| Cer(d36:2)           | - | M-H, M+FA-H    | 562.5214  | 1.58  | 0.011    | 1.23 |
| Cer(d37:1)           | - | M-H            | 578.5530  | 2.06  | 0.037    | 1.30 |

|                                                                  |   |                       |           |       |          |       |
|------------------------------------------------------------------|---|-----------------------|-----------|-------|----------|-------|
| Cer(d38:0(2OH))                                                  | - | M-H                   | 610.5790  | 1.63  | 0.001    | 1.45  |
| Cer(d40:0(2OH))                                                  | - | M-H                   | 638.6102  | 1.45  | 4.96E-04 | 1.30  |
| Cer(d40:0)                                                       | + | M+H                   | 624.6295  | 0.78  | 0.045    | 1.23  |
| Cer(d40:1)                                                       | + | M+Na                  | 644.5982  | 4.73  | 0.009    | 1.51  |
| HexCer(d34:1)                                                    | - | M-H, M+FA-H           | 698.5592  | 2.25  | 0.001    | 1.35  |
| HexCer(d35:1)                                                    | - | M-H                   | 712.5755  | 3.04  | 0.033    | 1.74  |
| HexCer(d36:0)                                                    | + | M+H                   | 730.6200  | 1.09  | 0.007    | 1.40  |
| HexCer(d36:0)                                                    | - | M-H                   | 728.6041  | -0.65 | 0.007    | 1.17  |
| HexCer(d36:1)                                                    | - | M-H, M+Na-2H          | 748.5303  | 2.33  | 0.021    | 1.10  |
| HexCer(d36:2(2OH))                                               | - | M-H                   | 740.5698  | 2.10  | 0.004    | 1.40  |
| HexCer(d37:1)                                                    | - | M-H                   | 740.6066  | 2.70  | 0.033    | 1.25  |
| HexCer(d38:0)                                                    | - | M-H                   | 756.6329  | -3.92 | 0.009    | 1.23  |
| HexCer(d38:1)                                                    | - | M-H, M+FA-H           | 754.6203  | 0.10  | 0.049    | 1.12  |
| HexCer(d40:1)                                                    | - | M-H                   | 782.6504  | -1.40 | 0.024    | 1.27  |
| HexCer(d40:2(2OH))                                               | - | M-H, M+FA-H           | 796.6310  | 0.34  | 9.75E-05 | 1.23  |
| HexCer(d40:2)                                                    | - | M-H, M+FA-H           | 780.6377  | 2.37  | 0.009    | 1.24  |
| HexCer(d41:2)                                                    | - | M-H, M+FA-H           | 794.6539  | 2.98  | 0.027    | 1.19  |
| C16 Sulfatide                                                    | - | M-H                   | 778.5159  | 1.91  | 0.003    | 1.24  |
| C22 Sulfatide                                                    | - | M-H                   | 862.6092  | 1.01  | 0.002    | 1.27  |
| NeuAca2-3Galβ1-4Glcβ-Cer(d36:1)                                  | - | M-H                   | 1179.7387 | 1.28  | 0.009    | 1.16  |
| NeuAca2-6GalNAcβ1-4Galβ1-4Glcβ-Cer(d36:1)                        | - | M-H                   | 1382.8166 | 0.06  | 0.005    | 1.24  |
| NeuAca2-8NeuAca2-3Galβ1-4Glcβ-Cer(d36:1)                         | - | M-H                   | 1470.8332 | 0.38  | 0.037    | 1.24  |
| GalNAcβ1-3Galα1-3Galα1-3Galα1-4Galβ1-4Glcβ-Cer(d44:1)            | - | M-H                   | 1852.0629 | 2.84  | 0.008    | 1.06  |
| Galα1-3(Fuca1-2)Galβ1-3GalNAcβ1-3Galα1-3Galβ1-4Glcβ-Cer(d42:1)   | - | M-H                   | 1808.0286 | -1.54 | 0.005    | 1.10  |
| Galα1-3(Fuca1-2)Galβ1-4(Fuca1-3)GlcNAcβ1-3Galβ1-4Glcβ-Cer(d42:2) | - | M-H, M+Na-2H          | 1811.9962 | -3.68 | 0.002    | 1.39  |
| Galβ1-3GalNAcβ1-4(KDNα2-3)Galβ1-4Glcβ-Cer(d44:1)                 | - | M-H                   | 1615.9616 | -3.95 | 0.041    | 13.62 |
| <b>Diacylglycerols</b>                                           |   |                       |           |       |          |       |
| DG(18:4)                                                         | + | M+H                   | 641.5119  | -3.20 | 0.004    | 1.31  |
| DG(35:0)                                                         | + | M+K                   | 649.5195  | 4.54  | 0.001    | 1.37  |
| DG(35:1)                                                         | + | M+K                   | 647.5011  | -0.03 | 0.009    | 2.14  |
| DG(36:4)                                                         | + | M+Na, M+K             | 655.4703  | 0.88  | 0.016    | 1.41  |
| DG(38:4)                                                         | + | M+NH4, M+K, M+Na, M+H | 667.5276  | 0.61  | 0.011    | 1.20  |
| DG(38:5)                                                         | + | M+Na, M+K             | 681.4859  | 0.28  | 0.013    | 1.39  |

|                         |   |                     |           |       |          |      |
|-------------------------|---|---------------------|-----------|-------|----------|------|
| DG(40:4)                | + | M+Na, M+K           | 695.5521  | 1.26  | 0.043    | 1.30 |
| DG(40:6)                | + | M+NH4, M+Na,<br>M+K | 691.5282  | 0.55  | 0.009    | 1.24 |
| DG(40:7)                | + | M+Na, M+K           | 705.4863  | 2.02  | 0.035    | 1.36 |
| DG(42:10)               | + | M+H, M+K            | 689.5137  | -0.38 | 0.025    | 1.67 |
| <b>Triacylglycerols</b> |   |                     |           |       |          |      |
| TG(43:2)                | + | M+Na                | 755.6135  | -3.47 | 0.008    | 1.27 |
| TG(47:6)                | - | M-H                 | 779.6219  | 3.09  | 0.004    | 1.26 |
| TG(50:1)                | + | M+Na, M+K,<br>M+NH4 | 871.7157  | 0.69  | 0.014    | 1.16 |
| TG(51:4)                | - | M+FA-H              | 885.7149  | -4.82 | 0.001    | 1.48 |
| TG(52:4)                | + | M+Na, M+K,<br>M+NH4 | 893.7016  | 2.47  | 0.006    | 1.28 |
| TG(52:5)                | + | M+K                 | 891.6867  | 3.35  | 0.003    | 1.37 |
| TG(52:6)                | + | M+Na, M+K           | 889.6682  | 0.06  | 0.004    | 1.25 |
| TG(54:4)                | + | M+Na, M+K           | 921.7313  | 2.66  | 0.002    | 1.24 |
| TG(54:5)                | + | M+NH4, M+K,<br>M+Na | 919.7162  | 1.22  | 0.007    | 1.20 |
| TG(54:6)                | + | M+Na, M+K,<br>M+NH4 | 917.7002  | 0.82  | 4.71E-04 | 1.28 |
| TG(54:7)                | + | M+Na, M+K           | 915.6844  | 0.68  | 0.001    | 1.28 |
| TG(56:6)                | + | M+NH4, M+K,<br>M+Na | 945.7319  | 1.29  | 0.001    | 1.30 |
| TG(56:7)                | + | M+NH4, M+K,<br>M+Na | 943.7157  | -2.45 | 2.84E-04 | 1.33 |
| TG(56:8)                | + | M+NH4, M+K,<br>M+Na | 941.7002  | 0.86  | 0.001    | 1.33 |
| TG(56:9)                | + | M+K                 | 939.6871  | 3.61  | 0.004    | 1.80 |
| TG(57:6)                | + | M+NH4               | 938.8170  | -0.07 | 0.003    | 1.43 |
| TG(58:10)               | + | M+Na, M+K           | 965.7018  | 2.56  | 2.62E-04 | 1.38 |
| TG(58:12)               | + | M+Na, M+K           | 945.6939  | -0.42 | 0.004    | 1.32 |
| TG(58:6)                | + | M+NH4               | 952.8304  | -2.51 | 0.041    | 1.74 |
| TG(58:7)                | + | M+NH4, M+K,<br>M+Na | 971.7478  | 1.54  | 0.004    | 1.24 |
| TG(58:9)                | + | M+K                 | 967.7157  | 0.61  | 4.30E-04 | 1.44 |
| TG(59:6)                | + | M+NH4               | 966.8479  | -0.52 | 0.004    | 1.50 |
| TG(59:7)                | + | M+NH4               | 964.8281  | -4.93 | 0.010    | 1.33 |
| TG(60:10)               | + | M+Na, M+K           | 993.7308  | 0.01  | 4.42E-04 | 1.37 |
| TG(60:11)               | + | M+Na, M+K,<br>M+NH4 | 991.7226  | 1.28  | 1.61E-04 | 1.31 |
| TG(60:12)               | + | M+Na, M+K,<br>M+NH4 | 989.7002  | 1.04  | 2.32E-04 | 1.38 |
| TG(60:8)                | + | M+Na, M+K           | 997.7637  | 1.66  | 0.009    | 1.47 |
| TG(62:12)               | + | M+Na, M+K,<br>M+NH4 | 1017.7321 | 1.32  | 0.002    | 1.33 |
| TG(62:13)               | + | M+NH4, M+K,<br>M+Na | 1015.7136 | -1.23 | 4.47E-04 | 1.44 |
| TG(62:14)               | + | M+H                 | 975.7435  | -0.18 | 0.026    | 2.57 |
| TG(66:18))              | + | M+K                 | 1061.7025 | 2.95  | 0.001    | 1.88 |

**Table ESM 1.** Lipid species increased in the brain tissue from *hBace1* knock-in mice compared to WT controls. Shown are specific lipid species, ionisation mode (+ positive or - negative), adducts, m/z values (mass/mass spectrum charge number), mass error, p values obtained from ANOVA analysis and fold-change compared to WT controls. Abbreviations: *PC* phosphatidylcholine (>50% of total phospholipids), *PE* phosphatidylethanolamine, *PI* phosphatidylinositol, *PL* phospholipids and *PS* phosphatidylserine.
