# Supplementary material for: Neuronal human BACE1 knockin induces systemic diabetes in mice
Source: Springer Nature journal article supplement (doi:10.1007/s00125-016-3960-1), 2016-05-02
Supplement: MOESM2 [file 10103142]

ESM Table 2

| Identification          | Ionisation Mode | Adducts   | m/z      | Mass Error (ppm) | Anova (p) | Fold Change |
|-------------------------|-----------------|-----------|----------|------------------|-----------|-------------|
| <b>Phospholipids</b>    |                 |           |          |                  |           |             |
| <b>PC and LysoPC</b>    |                 |           |          |                  |           |             |
| PC(24:0)                | +               | M+H       | 608.4653 | 0.54             | 0.014     | 1.21        |
| PC(30:1)                | +               | M+H       | 704.5233 | 1.12             | 2.30E-08  | 1.62        |
| PC(32:2)                | +               | M+H       | 730.5385 | 0.47             | 0.001     | 1.16        |
| PC(34:4)                | +               | M+H       | 754.5375 | -0.90            | 0.001     | 1.29        |
| PC(44:1)                | +               | M+Na      | 922.7261 | 2.90             | 0.025     | 1.42        |
| PC(44:2)                | +               | M+Na      | 920.7121 | 4.75             | 0.035     | 1.31        |
| PC(O-30:0)              | +               | M+H, M+Na | 692.5588 | -0.63            | 5.88E-06  | 1.22        |
| <b>PE and LysoPE</b>    |                 |           |          |                  |           |             |
| PE(32:0)                | +               | M+H       | 692.5233 | 1.17             | 3.43E-05  | 1.80        |
|                         | -               | M-H       | 690.5095 | 2.33             | 9.13E-05  | 1.32        |
| PE(32:1)                | +               | M+H       | 690.5089 | 2.91             | 0.001     | 1.14        |
| PE(34:1)                | +               | M+H       | 718.5386 | 0.63             | 0.001     | 1.22        |
| PE(42:1)                | +               | M+H       | 830.6593 | -4.95            | 0.013     | 1.17        |
| PE(O-40:0)              | +               | M+H       | 812.6519 | -1.08            | 0.024     | 1.16        |
| PE(P-32:1)              | +               | M+H       | 674.5134 | 2.14             | 2.79E-04  | 1.27        |
| PE(P-42:1)              | +               | M+H       | 814.6690 | 0.67             | 0.026     | 1.26        |
| <b>PS</b>               |                 |           |          |                  |           |             |
| PS(41:1)                | +               | M+H, M+Na | 860.6386 | 4.80             | 0.014     | 1.21        |
| PS(42:4)                | +               | M+Na      | 890.5845 | -4.27            | 0.029     | 1.14        |
| PS(P-30:1)              | +               | M+NH4     | 707.4938 | -4.70            | 0.008     | 1.25        |
| <b>Sphingomyelin</b>    |                 |           |          |                  |           |             |
| SM(d42:1)               | +               | M+H, M+Na | 815.7000 | -1.55            | 0.009     | 1.23        |
| <b>Sphingolipids</b>    |                 |           |          |                  |           |             |
| Cer(d32:1)              | +               | M+H       | 650.6443 | -0.52            | 0.029     | 1.68        |
| Cer(d42:0)              | +               | M+H       | 652.6599 | -0.53            | 0.012     | 1.19        |
| HexCer(d44:2)           | +               | M+H       | 838.7122 | -1.06            | 0.018     | 2.11        |
| <b>Diacylglycerols</b>  |                 |           |          |                  |           |             |
| DG(32:0)                | +               | M+H       | 569.5152 | 2.19             | 0.037     | 1.32        |
| <b>Triacylglycerols</b> |                 |           |          |                  |           |             |
| TG(45:5)                | +               | M+NH4     | 772.6418 | -4.26            | 0.045     | 1.88        |
| TG(56:1)                | +               | M+NH4     | 934.8803 | 0.64             | 0.020     | 1.15        |

**Table ESM 2.** Lipid species decreased in the brain tissue from hBace1 knock-in mice compared to WT controls. Shown are specific lipid species, ionisation mode (+ positive or - negative), adducts, m/z values

(mass/mass spectrum charge number), mass error, p values obtained from ANOVA analysis and fold-change compared to WT controls. Abbreviations: *PC* phosphatidylcholine (>50% of total phospholipids), *PE* phosphatidylethanolamine, *PI* phosphatidylinositol, *PL* phospholipids and *PS* phosphatidylserine.
