# Supplementary material for: Neuronal human BACE1 knockin induces systemic diabetes in mice
Source: Springer Nature journal article supplement (doi:10.1007/s00125-016-3960-1), 2016-05-02
Supplement: MOESM3 [file 10103142]

ESM Table 3

| Identification       | Ionisation Mode | Adducts          | m/z      | Mass Error (ppm) | Anova (p) | Fold Change |
|----------------------|-----------------|------------------|----------|------------------|-----------|-------------|
| <b>Phospholipids</b> |                 |                  |          |                  |           |             |
| <b>PC and LysoPC</b> |                 |                  |          |                  |           |             |
| PC(18:0)             | +               | M+H, M+Na, M+K   | 524.3714 | 0.68             | 0.011     | 1.24        |
| PC(20:5)             | +               | M+H, M+Na        | 542.3249 | 1.48             | 0.018     | 2.25        |
|                      | -               | M+FA-H           | 586.3171 | 3.83             | 0.015     | 2.01        |
| PC(22:4)             | +               | M+H              | 572.3719 | 1.46             | 0.014     | 1.33        |
|                      | -               | M+FA-H           | 616.3640 | 3.60             | 0.001     | 2.04        |
| PC(22:5)             | +               | M+H              | 570.3564 | 1.78             | 0.024     | 1.51        |
|                      | -               | M+FA-H           | 614.3487 | 4.05             | 0.041     | 1.34        |
| PC(24:0)             | +               | M+H              | 608.4657 | 1.17             | 0.049     | 1.40        |
|                      | -               | M+FA-H           | 652.4586 | 4.39             | 0.014     | 1.40        |
| PC(36:1)             | -               | M-H, M+FA-H      | 832.6107 | 4.27             | 0.019     | 1.41        |
| PC(36:2)             | +               | M+H, M+K         | 786.6008 | 0.02             | 0.022     | 1.52        |
|                      | -               | M+FA-H           | 830.5949 | 4.08             | 0.010     | 1.30        |
| PC(36:4)             | +               | M+H, M+Na, M+K   | 782.5693 | -0.20            | 0.033     | 1.18        |
| PC(36:5)             | +               | M+Na, M+K, M+NH4 | 802.5367 | 1.29             | 0.004     | 1.56        |
| PC(36:6)             | +               | M+NH4, M+K, M+H  | 778.5391 | 4.33             | 0.041     | 1.28        |
| PC(38:4)             | +               | M+H              | 810.6018 | 1.32             | 0.032     | 1.38        |
| PC(38:5)             | +               | M+H              | 808.5838 | -1.57            | 0.003     | 1.27        |
| PC(38:6)             | +               | M+H              | 806.5695 | 0.03             | 0.024     | 1.63        |
| PC(38:7)             | +               | M+Na, M+K        | 826.5374 | 2.06             | 0.012     | 1.36        |
|                      | -               | M+FA-H           | 848.5483 | 4.46             | 0.024     | 1.20        |
| PC(40:3)             | +               | M+Na             | 862.6292 | -0.55            | 0.008     | 6.59        |
| PC(40:5)             | +               | M+NH4            | 853.6441 | 1.40             | 0.001     | 1.50        |
| PC(40:6)             | +               | M+H, M+Na, M+K   | 834.5996 | 0.10             | 0.007     | 1.27        |
|                      | -               | M+FA-H           | 878.5942 | 3.02             | 0.011     | 1.41        |
| PC(40:7)             | +               | M+Na, M+K        | 854.5675 | -3.23            | 0.007     | 1.34        |
| PC(40:8)             | +               | M+Na, M+K, M+H   | 830.5695 | 1.52             | 7.54E-06  | 1.60        |
|                      | -               | M+FA-H           | 874.5640 | 4.33             | 2.16E-06  | 1.56        |
| PC(40:9)             | -               | M+FA-H           | 872.5485 | 4.60             | 0.008     | 6.75        |
| PC(42:10)            | +               | M+H, M+K         | 854.5698 | 0.38             | 0.000     | 1.90        |
| PC(42:5)             | -               | M+Cl             | 898.6105 | 0.85             | 0.031     | 1.19        |
| PC(42:7)             | +               | M+H, M+Na        | 860.6150 | -1.61            | 0.049     | 1.17        |
| PC(42:8)             | +               | M+H, M+Na        | 858.5975 | -3.81            | 0.001     | 1.36        |
| PC(44:12)            | +               | M+H, M+Na        | 878.5705 | 1.23             | 3.38E-04  | 1.80        |
| PC(O-16:0)           | +               | M+H, M+Na        | 482.3612 | 1.52             | 0.008     | 1.20        |
|                      | -               | M+FA-H           | 526.3532 | 3.68             | 0.029     | 1.40        |
| PC(O-36:4)           | +               | M+H              | 768.5871 | -4.05            | 0.011     | 1.19        |
|                      | -               | M+FA-H           | 812.5846 | 4.56             | 0.028     | 1.25        |
| PC(P-18:1)           | +               | M+H              | 506.3620 | 3.00             | 0.005     | 1.36        |

|                      |   |             |          |       |          |      |
|----------------------|---|-------------|----------|-------|----------|------|
| PC(P-32:1)           | + | M+H         | 716.5588 | -0.09 | 0.037    | 1.45 |
| PC(P-34:0)           | + | M+H         | 746.6061 | 0.34  | 0.005    | 1.24 |
| PC(P-38:4)           | - | M+FA-H      | 838.5973 | 0.72  | 0.016    | 1.26 |
| <b>PE and LysoPE</b> |   |             |          |       |          |      |
| PE(22:1)             | + | M+H         | 536.3717 | 1.23  | 0.005    | 1.34 |
| PE(22:5)             | - | M-H         | 526.2956 | 3.17  | 0.017    | 2.05 |
| PE(36:3)             | + | M+Na        | 764.5209 | 1.07  | 0.004    | 1.61 |
| PE(38:1)             | + | M+H         | 774.6017 | 1.24  | 0.005    | 1.17 |
| PE(38:2)             | - | M-H         | 770.5736 | 4.01  | 0.007    | 1.32 |
| PE(38:5)             | + | M+H         | 766.5375 | -0.86 | 0.009    | 1.52 |
| PE(40:1)             | + | M+H         | 802.6323 | 0.36  | 0.002    | 1.29 |
| PE(40:2)             | + | M+H, M+Na   | 800.6172 | 3.85  | 0.005    | 1.35 |
| PE(40:4)             | + | M+Na        | 818.5663 | -0.91 | 0.005    | 1.33 |
| PE(40:5)             | + | M+Na        | 816.5508 | -0.77 | 0.019    | 1.23 |
| PE(40:8)             | - | M-H         | 786.5117 | 4.73  | 0.002    | 2.25 |
| PE(42:3)             | + | M+K         | 864.5876 | -0.35 | 0.012    | 1.27 |
| PE(44:10)            | - | M-H         | 838.5431 | 4.66  | 0.001    | 2.94 |
| PE(44:2)             | + | M+H         | 856.6799 | 1.05  | 0.043    | 1.32 |
| PE(O-18:0)           | - | M-H         | 466.3317 | 3.01  | 0.026    | 1.39 |
| PE(P-20:0)           | - | M-H         | 492.3477 | 3.46  | 0.031    | 1.52 |
| PE(P-34:1)           | + | M+NH4       | 719.5713 | 2.26  | 7.50E-05 | 1.65 |
| PE(P-36:0)           | - | M-H         | 730.5748 | -1.10 | 0.007    | 1.59 |
| PE(P-38:3)           | + | M+NH4, M+Na | 776.6106 | 4.58  | 0.041    | 1.21 |
| PE(P-40:4)           | - | M-H, M+FA-H | 824.5485 | -3.98 | 0.004    | 1.37 |
| <b>PG</b>            |   |             |          |       |          |      |
| PG(42:3)             | - | M-H         | 855.6145 | 2.82  | 0.028    | 1.41 |
| <b>PS</b>            |   |             |          |       |          |      |
| PS(22:0)             | - | M-H         | 580.3639 | 3.32  | 0.003    | 2.16 |
| PS(34:0)             | + | M+NH4       | 781.5668 | -4.37 | 0.037    | 1.20 |
| PS(35:1)             | + | M+K         | 786.4678 | -0.52 | 0.024    | 1.20 |
| PS(36:1)             | + | M+NH4       | 807.5847 | -1.41 | 0.002    | 1.38 |
| PS(37:3)             | - | M-H         | 798.5323 | 4.12  | 0.005    | 1.73 |
| PS(39:1)             | - | M-H         | 830.5946 | 3.56  | 0.024    | 1.72 |
| PS(40:4)             | - | M-H         | 838.5642 | 4.57  | 0.008    | 1.16 |
| PS(41:3)             | + | M+Na, M+K   | 878.5861 | -3.20 | 0.021    | 1.46 |
| PS(41:4)             | + | M+Na        | 876.5699 | -3.05 | 0.007    | 1.13 |
| PS(41:6)             | + | M+Na        | 872.5390 | -2.60 | 0.015    | 1.28 |
| PS(41:7)             | + | M+Na        | 870.5249 | -0.77 | 0.004    | 1.60 |
| PS(42:4)             | + | M+Na        | 890.5876 | -0.67 | 0.003    | 1.46 |
|                      | - | M-H         | 866.5937 | 2.40  | 3.80E-04 | 2.11 |

|                                                                     |   |                     |           |       |          |      |
|---------------------------------------------------------------------|---|---------------------|-----------|-------|----------|------|
| PS(43:6)                                                            | - | M-H                 | 876.5781  | 2.36  | 0.007    | 1.44 |
| PS(44:7)                                                            | + | M+H                 | 890.5936  | 3.45  | 0.016    | 1.61 |
| PS(O-38:0)                                                          | + | M+H                 | 512.3353  | 1.22  | 0.028    | 5.28 |
| PS(P-36:0)                                                          | + | M+H                 | 776.5823  | 2.96  | 4.07E-06 | 2.26 |
| PS(P-36:1)                                                          | + | M+H                 | 774.5654  | 1.38  | 1.05E-04 | 1.70 |
| PS(P-36:5)                                                          | + | M+Na                | 788.4841  | 0.60  | 0.050    | 1.57 |
| PS(P-38:0)                                                          | + | M+H                 | 804.6137  | 3.00  | 0.027    | 1.46 |
| <b>PI</b>                                                           |   |                     |           |       |          |      |
| PI(34:3)                                                            | - | M-H                 | 831.5065  | 4.37  | 0.008    | 1.65 |
| PI(36:4)                                                            | - | M-H                 | 857.5220  | 4.05  | 0.030    | 1.26 |
| PI(36:5)                                                            | - | M-H                 | 855.5067  | 4.46  | 0.001    | 2.05 |
| PI(38:5)                                                            | - | M-H                 | 883.5383  | 4.67  | 0.001    | 1.48 |
| PI(40:6)                                                            | - | M-H                 | 909.5539  | 4.50  | 0.019    | 1.38 |
| <b>Other PL</b>                                                     |   |                     |           |       |          |      |
| PA(O-42:6)                                                          | - | M-H                 | 761.5483  | -0.96 | 0.002    | 2.44 |
| <b>Sphingomyelin</b>                                                |   |                     |           |       |          |      |
| SM(d32:1)                                                           | + | M+H                 | 675.5445  | 1.44  | 0.001    | 1.31 |
|                                                                     | - | M+FA-H              | 719.5374  | 4.40  | 0.004    | 1.42 |
| SM(d33:1)                                                           | + | M+H, M+Na           | 689.5603  | 1.53  | 0.007    | 1.36 |
| SM(d34:1)                                                           | + | M+H                 | 717.5565  | 3.26  | 4.83E-05 | 1.69 |
| SM(d34:2)                                                           | + | M+H, M+Na, M+K      | 701.5604  | 1.66  | 0.006    | 1.25 |
| SM(d36:1)                                                           | - | M+FA-H              | 775.5991  | 2.72  | 0.001    | 1.56 |
| SM(d36:2)                                                           | - | M+FA-H              | 773.5832  | 2.41  | 0.006    | 1.39 |
| SM(d36:3)                                                           | + | M+H                 | 727.5754  | 0.78  | 0.040    | 1.21 |
| SM(d39:1)                                                           | + | M+K                 | 811.6058  | -4.13 | 0.049    | 1.60 |
| SM(d40:2)                                                           | - | M-H                 | 783.6424  | 4.95  | 0.014    | 1.37 |
| SM(d42:3)                                                           | - | M+FA-H              | 855.6627  | 3.73  | 0.044    | 1.23 |
| <b>Sphingolipids</b>                                                |   |                     |           |       |          |      |
| Cer(d32:2(2OH))                                                     | + | M+H                 | 524.4672  | -0.21 | 0.008    | 1.53 |
| HexCer (d32:2)                                                      | + | M+Na                | 832.6604  | -4.12 | 0.012    | 1.40 |
| HexCer(d32:1)                                                       | + | M+Na, M+K           | 834.6776  | -2.09 | 0.000    | 1.44 |
| HexCer(d34:1(2OH))                                                  | - | M+FA-H              | 760.5558  | -3.08 | 0.029    | 2.63 |
| HexCer(d41:1)                                                       | - | M-H, M+FA-H, M+K-2H | 842.6762  | 4.39  | 0.006    | 1.48 |
| HexCer(d42:1)                                                       | - | M-H                 | 810.6862  | 4.10  | 0.002    | 1.44 |
| HexCer(d42:2)                                                       | - | M-H                 | 808.6657  | -1.81 | 0.042    | 1.32 |
| GalNAc $\beta$ 1-4(NeuGca2-3)Gal $\beta$ 1-4Glc $\beta$ -Cer(d42:1) | + | M+H, M+Na           | 1484.9231 | 2.12  | 0.043    | 1.33 |

| <b>Diacylglycerols</b>  |   |                     |           |       |          |          |
|-------------------------|---|---------------------|-----------|-------|----------|----------|
|                         |   |                     |           |       |          |          |
| DG(36:4)                | + | M+Na, M+K           | 655.4708  | 1.49  | 0.038    | 1.26     |
| DG(37:4)                | - | M+H                 | 629.5174  | 3.67  | 0.001    | 3.53     |
| DG(38:5)                | + | M+Na                | 665.5086  | -4.65 | 0.044    | 1.22     |
| <b>Triacylglycerols</b> |   |                     |           |       |          |          |
|                         |   |                     |           |       |          |          |
| TG(46:6)                | + | M+H                 | 767.6166  | -2.43 | 0.019    | 2.93     |
| TG(47:3)                | + | M+NH4               | 804.7080  | 0.57  | 0.019    | Infinity |
| TG(48:7)                | + | M+H                 | 793.6328  | -1.64 | 0.048    | 2.45     |
| TG(50:9)                | + | M+NH4               | 834.6613  | 0.85  | 0.001    | 1.46     |
| TG(51:8)                | + | M+H                 | 833.6636  | -2.18 | 0.007    | 1.83     |
| TG(53:9)                | + | M+H                 | 859.6792  | -2.07 | 0.017    | 1.68     |
| TG(54:12)               | + | M+K                 | 905.6059  | 0.35  | 0.041    | 1.23     |
| TG(55:10)               | + | M+K                 | 923.6535  | 1.06  | 0.012    | 44.88    |
| TG(61:4)                | + | M+NH4, M+Na         | 835.6793  | 0.83  | 0.040    | 1.71     |
| TG(66:4)                | + | M+NH4, M+Na,<br>M+K | 1073.9468 | 1.99  | 0.043    | 3.07     |
| TG(66:5)                | + | M+Na, M+K           | 1071.9288 | -0.23 | 1.18E-04 | 10.01    |
| TG(68:5)                | + | M+Na, M+K           | 1099.9628 | 0.66  | 0.044    | 2.20     |

**Table ESM 3.** Lipid species increased in the plasma of hBace1 knock-in mice compared to WT controls. Shown are specific lipid species, ionisation mode (+ positive or - negative), adducts, m/z values (mass/mass spectrum charge number), mass error, p values obtained from ANOVA analysis and fold-change compared to WT controls. Abbreviations: *PC* phosphatidylcholine (>50% of total phospholipids), *PE* phosphatidylethanolamine, *PI* phosphatidylinositol, *PL* phospholipids and *PS* phosphatidylserine.
