# Supplementary material for: Neuronal human BACE1 knockin induces systemic diabetes in mice
Source: Springer Nature journal article supplement (doi:10.1007/s00125-016-3960-1), 2016-05-02
Supplement: MOESM4 [file 10103142]

ESM Table 4

| Identification                                                                            | Ionisation Mode | Adducts | m/z       | Mass Error (ppm) | Anova (p) | Fold Change |
|-------------------------------------------------------------------------------------------|-----------------|---------|-----------|------------------|-----------|-------------|
| <b>Phospholipids</b>                                                                      |                 |         |           |                  |           |             |
| <b>PC and LysoPC</b>                                                                      |                 |         |           |                  |           |             |
|                                                                                           |                 |         |           |                  |           |             |
| PC(14:0)                                                                                  | +               | M+H     | 468.3093  | 1.83             | 2.83E-06  | 2.13        |
|                                                                                           | -               | M+FA-H  | 512.3009  | 3.28             | 0.005     | 1.63        |
| PC(22:1)                                                                                  | +               | M+H     | 578.4187  | 1.17             | 0.030     | 1.15        |
| PC(38:4)                                                                                  | +               | M+H     | 810.6037  | 3.66             | 0.023     | 1.76        |
| PC(42:0)                                                                                  | +               | M+K     | 912.6834  | 1.79             | 0.008     | 1.60        |
| PC(42:4)                                                                                  | +               | M+H     | 866.6642  | 1.05             | 0.043     | 1.19        |
| PC(44:7)                                                                                  | +               | M+H     | 888.6496  | 2.10             | 0.018     | 1.23        |
| <b>PE and LysoPE</b>                                                                      |                 |         |           |                  |           |             |
| PE(16:0)                                                                                  | -               | M-H     | 452.2798  | 3.29             | 0.005     | 1.73        |
| PE(18:0)                                                                                  | +               | M+H     | 482.3251  | 2.12             | 0.036     | 1.40        |
| PE(44:6)                                                                                  | +               | M+H     | 848.6148  | -1.90            | 0.038     | 1.81        |
| PE(O-38:5)                                                                                | +               | M+H     | 752.5620  | 4.18             | 0.012     | 1.65        |
| <b>PS</b>                                                                                 |                 |         |           |                  |           |             |
| PS(43:0)                                                                                  | -               | M+FA-H  | 934.6719  | -3.88            | 0.017     | 2.68        |
| <b>Sphingolipids</b>                                                                      |                 |         |           |                  |           |             |
| Cer(d34:1)                                                                                | -               | M-H     | 536.5063  | 2.78             | 0.032     | 2.32        |
| Cer(d38:1(2OH))                                                                           | -               | M-H     | 608.5650  | 4.32             | 0.022     | Infinity    |
| Cer(t38:0)                                                                                | -               | M-H     | 610.5810  | 4.99             | 0.002     | 1.54        |
| Lactosylceramide (d44:2)                                                                  | +               | M+Na    | 1022.7442 | -3.57            | 0.033     | 1.20        |
| NeuAcalpha2-3Galbeta1-4GlcNAcalpha1-3Galbeta1-4GlcNAcbeta1-3Galbeta1-4Glcbeta-Cer(d42:1)) | -               | M-H     | 1992.0813 | 0.73             | 0.017     | 2.44        |
| NeuGcalpha2-3Galbeta1-3GalNAcbeta1-4(NeuGcalpha2-3)Galbeta1-4Glcbeta-Cer(d46:2)           | +               | M+H     | 1952.0497 | 1.15             | 0.048     | 2.29        |
| <b>Diacylglycerols</b>                                                                    |                 |         |           |                  |           |             |
| DG(34:3)                                                                                  | +               | M+Na    | 613.4792  | -1.70            | 0.046     | 3.61        |
| <b>Triacylglycerols</b>                                                                   |                 |         |           |                  |           |             |
| TG(56:7)                                                                                  | +               | M+NH4   | 922.7900  | 4.60             | 0.015     | 1.19        |
| TG(58:12)                                                                                 | +               | M+NH4   | 954.7557  | 1.28             | 0.022     | 1.31        |
| TG(62:5)                                                                                  | +               | M+NH4   | 1024.9243 | -2.34            | 0.048     | 5.34        |

**Table ESM 4.** Lipid species decreased in the plasma of hBace1 knock-in mice compared to WT controls. Shown are specific lipid species, ionisation mode (+ positive or - negative), adducts, m/z values (mass/mass spectrum charge number), mass error, p values obtained from ANOVA analysis and fold-change compared to WT controls. Abbreviations: *PC* phosphatidylcholine (>50% of total phospholipids), *PE* phosphatidylethanolamine, *PI* phosphatidylinositol, *PL* phospholipids and *PS* phosphatidylserine.
